# Supplementary material for: Protective Effects of Reduced Glutathione and Ulinastatin on Xeno-transplanted Human Ovarian Tissue Against Ischemia and Reperfusion Injury
Source: PubMed Central journal article supplement — Cell Transplant. 2021 Mar 30;30:0963689721997151. doi: 10.1177/0963689721997151 (PMC8013881; doi:10.1177/0963689721997151), 2021-03-30
Supplement: sj-pdf-1-cll-10.1177_0963689721997151.pdf [file sj-pdf-1-cll-10.1177_0963689721997151.pdf]

**Supplemental table 1. The number of ovarian grafts in each group for each experiment**

|                  | Embedding<br>in paraffin | Isolation of<br>follicles and<br>classification | Measurement of<br>Lipid Peroxide<br>Malondialdehyde | Quantitative<br>polymerase<br>chain reaction | Freezing<br>and<br>served | Total |
|------------------|--------------------------|-------------------------------------------------|-----------------------------------------------------|----------------------------------------------|---------------------------|-------|
| Control<br>group | 63                       | 35                                              | 6                                                   | 6                                            | 16                        | 504   |
| GSH<br>group     | 63                       | 35                                              | 6                                                   | 6                                            | 16                        |       |
| UTI<br>group     | 63                       | 35                                              | 6                                                   | 6                                            | 16                        |       |
| GSH+UTI<br>group | 63                       | 35                                              | 6                                                   | 6                                            | 16                        |       |

In this study, there were 84 SCID mice randomly dividing into 4 groups. Three mice in each group were sacrificed to take the grafts (6 grafts/ mice) at the 1<sup>st</sup>, 3<sup>rd</sup>, 7<sup>th</sup>, 14<sup>th</sup>, 28<sup>th</sup>, 56<sup>th</sup>, 85<sup>th</sup> day after transplantation respectively.

Half of the grafts were embedding in paraffin and serially sectioned. Slides were used in HE staining and immunohistochemistry staining. Rest grafts were used in other experiments. For details, there were five grafts were used at each time point (1<sup>st</sup>, 3<sup>rd</sup>, 7<sup>th</sup>, 14<sup>th</sup>, 28<sup>th</sup>, 56<sup>th</sup>, 85<sup>th</sup> day after transplantation) of each group in the follicles isolation experiments, and two grafts were used in q-PCR and ELISA at the each time point (1<sup>st</sup>, 3<sup>rd</sup>, 7<sup>th</sup> day after transplantation) of each group, and the rest of grafts were freezing and served. The clear details were showed in supplemental table 2.

**Supplemental table 2. The number of ovarian grafts in each group at the different time point**

| Time       | Experiment            | Quantity of human ovarian tissue |              |              |                  |
|------------|-----------------------|----------------------------------|--------------|--------------|------------------|
|            |                       | Control<br>group                 | GSH<br>Group | UTI<br>Group | GSH+UTI<br>Group |
| 1st<br>day | Embedding in paraffin | 9                                | 9            | 9            | 9                |
|            | Live/Dead staining    | 5                                | 5            | 5            | 5                |
|            | MDA and qPCR          | 4                                | 4            | 4            | 4                |
| 3rd<br>day | Embedding in paraffin | 9                                | 9            | 9            | 9                |
|            | Live/Dead staining    | 5                                | 5            | 5            | 5                |

|             |                       |   |   |   |   |
|-------------|-----------------------|---|---|---|---|
|             | MDA and qPCR          | 4 | 4 | 4 | 4 |
| 7th<br>day  | Embedding in paraffin | 9 | 9 | 9 | 9 |
|             | Live/Dead staining    | 5 | 5 | 5 | 5 |
|             | MDA and qPCR          | 4 | 4 | 4 | 4 |
| 14th<br>day | Embedding in paraffin | 9 | 9 | 9 | 9 |
|             | Live/Dead staining    | 5 | 5 | 5 | 5 |
|             | freezing and served   | 4 | 4 | 4 | 4 |
| 28th<br>day | Embedding in paraffin | 9 | 9 | 9 | 9 |
|             | Live/Dead staining    | 5 | 5 | 5 | 5 |
|             | freezing and served   | 4 | 4 | 4 | 4 |
| 56th<br>day | Embedding in paraffin | 9 | 9 | 9 | 9 |
|             | Live/Dead staining    | 5 | 5 | 5 | 5 |
|             | freezing and served   | 4 | 4 | 4 | 4 |
| 85th<br>day | Embedding in paraffin | 9 | 9 | 9 | 9 |
|             | Live/Dead staining    | 5 | 5 | 5 | 5 |
|             | freezing and served   | 4 | 4 | 4 | 4 |

---
